# Supplementary material for: Comparative Virucidal Activities of Essential Oils and Alcohol-Based Solutions against Enveloped Virus Surrogates: In Vitro and In Silico Analyses
Source: MDPI journal article supplement (doi:10.3390/molecules28104156), 2023-05-18
Supplement: s1 [file s1]

# Comparative Virucidal Activities of Essential Oils and Alcohol-Based Solutions against Enveloped Virus Surrogates: In Vitro and In Silico Analyses

Valentina Parra-Acevedo <sup>1</sup>, Raquel E. Ocazonez <sup>1,\*</sup>, Elena E. Stashenko <sup>1</sup>, Lina Silva-Trujillo <sup>1</sup> and Paola Rondón-Villarreal <sup>2</sup>

<sup>1</sup> Centro de Cromatografía y Espectrometría de Masas—CROM-MASS, Universidad Industrial de Santander, Bucaramanga 680002, Colombia; valentina2218470@correo.uis.edu.co (V.P.-A.); elena@tucan.uis.edu.co (E.E.S.); lina2198192@correo.uis.edu.co (L.S.-T.)

<sup>2</sup> Facultad de Ciencias Médicas y de la Salud, Instituto de Investigación Masira, Universidad de Santander, Bucaramanga 680003, Colombia; diseno.molecular@udes.edu.co

\* Correspondence: relocaz@uis.edu.co

**Table S1.** AutoDock Vina binding energies values of compounds identified in the EO blend for target proteins.

| Type                       | Compound                      | DENV-2      |             | CHKV        |
|----------------------------|-------------------------------|-------------|-------------|-------------|
|                            |                               | E           | prM/M       | E1-E2-E3    |
| Sesquiterpene hydrocarbons | δ-Cadinene                    | -8.61 ± 0.8 | -5.47 ± 0.1 | -6.25 ± 0.1 |
|                            | α-Guaiene                     | -8.55 ± 1.0 | -5.29 ± 0.1 | -6.38 ± 0.2 |
|                            | γ-Cadinene                    | -8.22 ± 1.0 | -5.26 ± 0.2 | -6.22 ± 0.1 |
|                            | α-Bulnesene                   | -8.12 ± 0.9 | -5.37 ± 0.2 | -6.26 ± 0.2 |
|                            | Germacrene D                  | -7.03 ± 1.1 | -5.40 ± 0.1 | -6.25 ± 0.2 |
|                            | β-Elemene                     | -6.49 ± 0.9 | -4.85 ± 0.5 | -5.92 ± 0.2 |
|                            | <i>trans</i> -β-Caryophyllene | -6.48 ± 0.5 | -5.36 ± 0.2 | -6.32 ± 0.1 |
|                            | α-Muurolene                   | -5.91 ± 0.5 | -5.26 ± 0.3 | -6.18 ± 0.2 |
|                            | γ-Muurolene                   | -5.91 ± 0.3 | -5.26 ± 0.3 | -6.18 ± 0.2 |
|                            | α-Humulene                    | -5.90 ± 0.5 | -5.29 ± 0.3 | -6.37 ± 0.3 |
|                            | <i>epi</i> -α-Muurolol        | -8.10 ± 1.0 | -5.42 ± 0.1 | -6.37 ± 0.2 |
|                            | Farnesol *                    | -6.57 ± 0.6 | -5.33 ± 0.2 | -6.01 ± 0.2 |
|                            | α-Cadinol *                   | -6.54 ± 0.5 | -5.28 ± 0.2 | -6.70 ± 0.2 |
|                            | α-Eudesmol *                  | -6.50 ± 0.6 | -5.47 ± 0.1 | -6.70 ± 0.3 |
| Oxygenated sesquiterpenes  | Elemol                        | -6.49 ± 0.9 | -5.02 ± 0.2 | -5.90 ± 0.2 |
|                            | Germacrene D-4-ol             | -5.80 ± 0.6 | -5.41 ± 0.1 | -6.38 ± 0.2 |
|                            | <i>epi</i> -α-Cadinol         | -5.75 ± 0.6 | -5.18 ± 0.1 | -6.29 ± 0.2 |
|                            | <i>trans</i> -Nerolidol       | -5.70 ± 0.5 | -4.62 ± 0.2 | -5.34 ± 0.3 |
|                            | Patchoulol                    | -5.67 ± 0.2 | -4.97 ± 0.1 | -6.45 ± 0.2 |
|                            | Caryophyllene oxide           | -5.90 ± 0.5 | -5.25 ± 0.1 | -6.50 ± 0.3 |
|                            | Limonene                      | -7.22 ± 0.2 | -4.60 ± 0.4 | -5.16 ± 0.1 |
| Monoterpene hydrocarbons   | γ-Terpinene                   | -7.18 ± 0.4 | -4.95 ± 0.4 | -5.29 ± 0.1 |
|                            | <i>p</i> -Cymene              | -7.16 ± 0.5 | -4.89 ± 0.3 | -5.34 ± 0.1 |
|                            | <i>trans</i> -β-Ocimene       | -6.47 ± 0.3 | -4.62 ± 0.1 | -4.81 ± 0.1 |
|                            | β-Myrcene                     | -5.98 ± 0.6 | -4.08 ± 0.2 | -4.72 ± 0.2 |
|                            | α-Pinene                      | -5.02 ± 0.3 | -4.24 ± 0.1 | -5.13 ± 0.1 |
|                            | Carvacrol                     | -7.32 ± 0.3 | -5.29 ± 0.4 | -5.49 ± 0.1 |
| Phenolic compounds         | Thymol                        | -7.03 ± 0.4 | -5.31 ± 0.3 | -5.48 ± 0.1 |
|                            | Eugenol *                     | -6.54 ± 0.5 | -5.16 ± 0.4 | -5.46 ± 0.3 |
| Oxygenated monoterpenes    | Isopulegol *                  | -6.70 ± 0.6 | -4.85 ± 0.2 | -5.19 ± 0.1 |

|                            |                         |                 |                 |                 |
|----------------------------|-------------------------|-----------------|-----------------|-----------------|
|                            | Citronellyl acetate     | $-6.32 \pm 0.4$ | $-4.81 \pm 0.2$ | $-5.40 \pm 0.2$ |
|                            | Geranyl acetate         | $-6.30 \pm 0.5$ | $-5.23 \pm 0.2$ | $-5.71 \pm 0.2$ |
|                            | Neral                   | $-6.25 \pm 0.5$ | $-4.10 \pm 0.2$ | $-4.86 \pm 0.2$ |
|                            | Geranial                | $-6.20 \pm 0.4$ | $-4.28 \pm 0.2$ | $-4.95 \pm 0.2$ |
|                            | Citronellol             | $-6.07 \pm 0.3$ | $-4.51 \pm 0.2$ | $-5.01 \pm 0.1$ |
|                            | Neryl hexanoate         | $-5.98 \pm 0.4$ | $-5.24 \pm 0.2$ | $-5.71 \pm 0.3$ |
|                            | Geraniol                | $-5.91 \pm 0.5$ | $-4.65 \pm 0.2$ | $-5.18 \pm 0.1$ |
|                            | Citronellal             | $-5.75 \pm 0.5$ | $-4.03 \pm 0.3$ | $-4.72 \pm 0.2$ |
|                            | Linalool                | $-5.72 \pm 0.5$ | $-4.31 \pm 0.2$ | $-4.91 \pm 0.1$ |
|                            | 1,8-Cineole             | $-4.77 \pm 0.2$ | $-4.24 \pm 0.2$ | $-5.16 \pm 0.2$ |
| Other oxygenated compounds | <i>n</i> -Decanal       | $-5.47 \pm 0.3$ | $-5.47 \pm 0.3$ | $-4.56 \pm 0.1$ |
|                            | 6-Methyl-5-hepten-2-one | $-5.51 \pm 0.2$ | $-4.31 \pm 0.2$ | $-4.43 \pm 0.2$ |

\* Compounds marked with an asterisk were identified in the present study, and the other compounds were also identified in a previous study [25].

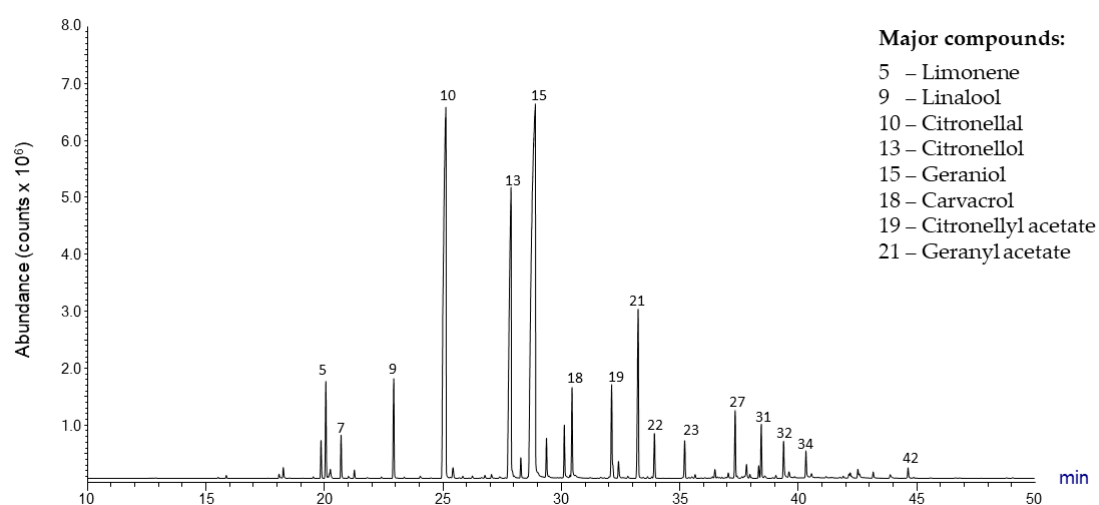

**Figure S1.** Chromatogram of the blend of seven essential oils used for virucidal activity study. DB-5 capillary column (60 m). Split 1:30. See peak identification in Table 5.
